# Supplementary material for: Antimicrobial Resistance in Members of the Bacterial Bovine Respiratory Disease Complex Isolated from Lung Tissue of Cattle Mortalities Managed with or without the Use of Antimicrobials
Source: PubMed Central journal article supplement (PMC7074851; doi:10.3390/microorganisms8020288), 2020-02-20
Supplement: microorganisms-08-00288-s001.pdf [file microorganisms-08-00288-s001.pdf]

Table S1. Distribution of minimum inhibitory concentrations (MICs) of *Mycoplasma bovis* isolated from lung tissue (n=61) of bovine respiratory disease mortalities. Dilution ranges tested are not shaded. Cells highlighted in yellow had growth at the highest concentration evaluated.

| Antimicrobial agent     | Abbreviation | Manage <sup>z</sup> | S <sup>y</sup> | MIC $\mu\text{g/mL}$ |      |     |   |    |    |    |    |    |    |     |     |
|-------------------------|--------------|---------------------|----------------|----------------------|------|-----|---|----|----|----|----|----|----|-----|-----|
|                         |              |                     |                | 0.12                 | 0.25 | 0.5 | 1 | 2  | 4  | 8  | 16 | 32 | 64 | 128 | 256 |
| Chlortetracycline       | CTET         | CON                 | 15             |                      |      |     |   | 3  | 20 | 16 |    |    |    |     |     |
|                         |              | NAT                 | 3              |                      |      |     |   |    | 3  | 1  |    |    |    |     |     |
| Enrofloxacin            | ENRO         | CON                 | 39             |                      | 5    |     |   | 2  | 3  | 3  | 2  |    |    |     |     |
|                         |              | NAT                 | 7              |                      |      |     |   |    |    |    |    |    |    |     |     |
| Florfenicol             | FFN          | CON                 | 2              |                      |      |     | 4 | 12 | 22 | 13 | 1  |    |    |     |     |
|                         |              | NAT                 |                |                      |      | 1   |   | 2  | 4  |    |    |    |    |     |     |
| Gamithromycin           | GAM          | CON                 |                |                      |      |     |   |    |    |    |    |    | 1  | 6   | 47  |
|                         |              | NAT                 |                |                      |      |     |   |    |    |    | 1  |    | 1  | 1   | 4   |
| Oxytetracycline         | OXY          | CON                 | 9              |                      |      |     |   | 9  | 21 | 15 |    |    |    |     |     |
|                         |              | NAT                 | 2              |                      |      |     | 1 |    | 3  | 1  |    |    |    |     |     |
| Penicillin <sup>x</sup> | PEN          | CON                 |                |                      |      |     |   |    |    | 54 |    |    |    |     |     |
|                         |              | NAT                 |                |                      |      |     |   |    |    | 7  |    |    |    |     |     |
| Tilimicosin             | TIL          | CON                 |                |                      |      |     |   |    |    |    |    | 1  |    |     | 53  |
|                         |              | NAT                 |                |                      |      |     |   |    |    |    |    |    |    |     | 7   |
| Tildipirosin            | TIP          | CON                 |                |                      |      |     |   |    |    |    |    | 1  |    | 53  |     |
|                         |              | NAT                 |                |                      |      |     |   |    |    |    |    |    |    | 7   |     |
| Tulathromycin           | TUL          | CON                 |                |                      |      |     |   |    |    | 3  | 3  | 1  |    |     | 47  |
|                         |              | NAT                 |                |                      |      |     |   |    |    |    | 1  | 2  |    |     | 4   |
| Tylosin tartarate       | TYLT         | CON                 | 2              |                      |      |     |   |    | 1  | 3  | 1  | 1  | 1  | 5   | 40  |
|                         |              | NAT                 |                |                      |      |     |   |    |    |    | 1  | 1  |    |     | 5   |

<sup>z</sup>Manage, CON=conventional management with antimicrobials, NAT= without antimicrobials.

<sup>y</sup>S, susceptible to the lowest concentration evaluated.

<sup>x</sup>Used as a positive control.

Table S2. Distribution of minimum inhibitory concentrations (MICS) of *Mannheimia haemolytica* (n=104) isolated from lung tissue of bovine respiratory disease mortalities. Dilution ranges tested are not shaded. Cells highlighted in yellow had growth at the highest concentration evaluated.

|                                |              | MIC µg/mL           |                |      |      |     |    |    |    |    |    |    |    |     |     |
|--------------------------------|--------------|---------------------|----------------|------|------|-----|----|----|----|----|----|----|----|-----|-----|
| Antimicrobial                  | Abbreviation | Manage <sup>z</sup> | S <sup>y</sup> | 0.12 | 0.25 | 0.5 | 1  | 2  | 4  | 8  | 16 | 32 | 64 | 128 | 256 |
| Ampicillin                     | AMP          | CON                 | 47             |      |      | 5   | 1  | 2  |    | 1  |    | 42 |    |     |     |
|                                |              | NAT                 | 6              |      |      |     |    |    |    |    |    |    |    |     |     |
| Ceftiofur                      | TIO          | CON                 | 72             |      |      | 16  | 7  | 1  |    | 1  | 1  |    |    |     |     |
|                                |              | NAT                 | 4              |      |      | 2   |    |    |    |    |    |    |    |     |     |
| Clindamycin                    | CLI          | CON                 |                |      |      |     |    |    |    | 2  | 14 | 82 |    |     |     |
|                                |              | NAT                 |                |      |      |     |    |    |    |    | 3  | 3  |    |     |     |
| Chlortetracycline              | CTET         | CON                 |                |      |      |     | 34 | 7  | 16 | 39 | 2  |    |    |     |     |
|                                |              | NAT                 |                |      |      |     | 3  | 1  | 1  |    |    |    |    |     |     |
| Danofloxacin                   | DANO         | CON                 | 47             |      | 4    |     | 4  | 43 |    |    |    |    |    |     |     |
|                                |              | NAT                 | 6              |      |      |     |    |    |    |    |    |    |    |     |     |
| Enrofloxacin                   | ENRO         | CON                 | 50             |      | 1    |     | 4  |    | 43 |    |    |    |    |     |     |
|                                |              | NAT                 | 6              |      |      |     |    |    |    |    |    |    |    |     |     |
| Florfenicol                    | FFN          | CON                 | 1              |      |      | 4   | 46 | 2  | 2  | 1  | 42 |    |    |     |     |
|                                |              | NAT                 |                |      |      |     | 5  | 1  |    |    |    |    |    |     |     |
| Gentamicin                     | GEN          | CON                 | 46             |      |      |     |    |    | 7  | 1  | 44 |    |    |     |     |
|                                |              | NAT                 | 4              |      |      |     |    |    | 1  | 1  |    |    |    |     |     |
| Neomycin                       | NEO          | CON                 | 4              |      |      |     |    |    |    | 31 | 1  | 1  | 61 |     |     |
|                                |              | NAT                 |                |      |      |     |    |    |    | 4  |    |    | 2  |     |     |
| Oxytetracycline                | OXY          | CON                 | 3              |      |      |     | 29 | 2  |    | 1  | 63 |    |    |     |     |
|                                |              | NAT                 | 1              |      |      |     | 3  |    |    |    | 2  |    |    |     |     |
| Penicillin                     | PEN          | CON                 | 13             |      | 33   | 8   | 1  |    |    |    | 43 |    |    |     |     |
|                                |              | NAT                 | 1              |      | 4    | 1   |    |    |    |    |    |    |    |     |     |
| Sulphadi methoxine             | SDM          | CON                 | 1              |      |      |     |    |    |    |    |    |    |    |     | 97  |
|                                |              | NAT                 | 1              |      |      |     |    |    |    |    |    |    |    |     | 5   |
| Spectinomycin                  | SPE          | CON                 | 1              |      |      |     |    |    |    |    | 3  | 47 | 2  | 45  |     |
|                                |              | NAT                 |                |      |      |     |    |    |    |    |    | 6  |    |     |     |
| Trimethoprim/ Sulfamethoxazole | SXT          | CON                 | 28             | 70   |      |     |    |    |    |    |    |    |    |     |     |
|                                |              | NAT                 | 4              | 2    |      |     |    |    |    |    |    |    |    |     |     |
| Tiamulin                       | TIA          | CON                 | 1              |      |      |     |    |    |    | 13 | 54 | 30 | 63 |     |     |
|                                |              | NAT                 |                |      |      |     |    |    |    |    | 4  | 2  |    |     |     |
| Tilmicosin                     | TIL          | CON                 | 20             |      |      |     |    |    |    | 2  | 4  | 1  | 3  | 68  |     |
|                                |              | NAT                 | 4              |      |      |     |    |    |    |    | 2  |    |    |     |     |
| Tulathromycin                  | TUL          | CON                 | 1              |      |      |     |    | 2  | 10 | 11 | 2  | 1  | 2  | 69  |     |
|                                |              | NAT                 |                |      |      |     |    |    | 2  | 2  | 2  |    |    |     |     |
| Tylosin tartarate              | TYLT         | CON                 | 3              |      |      |     |    |    |    |    |    |    | 95 |     |     |
|                                |              | NAT                 |                |      |      |     |    |    |    |    |    |    | 6  |     |     |

<sup>z</sup>Manage, CON=conventional management with antimicrobials, NAT =without antimicrobials.

<sup>y</sup>S, susceptible to the lowest concentration evaluated.

Table S3. Distribution of minimum inhibitory concentrations (MICs) of *Pasteurella multocida* (n=45) isolated from lung tissue of bovine respiratory disease mortalities. Dilution ranges tested are not shaded. Cells highlighted in yellow had growth at the highest concentration evaluated.

| Antimicrobial agent               | Abbreviation | Manage <sup>z</sup> | S <sup>y</sup> | MIC values µg/mL |      |     |    |    |    |    |    |    |    |     |       |  |
|-----------------------------------|--------------|---------------------|----------------|------------------|------|-----|----|----|----|----|----|----|----|-----|-------|--|
|                                   |              |                     |                | 0.12             | 0.25 | 0.5 | 1  | 2  | 4  | 8  | 16 | 32 | 64 | 128 | > 256 |  |
| Ampicillin                        | AMP          | CON                 | 3              |                  |      |     | 2  | 7  | 16 | 3  | 1  | 9  |    |     |       |  |
|                                   |              | NAT                 |                |                  |      |     |    |    | 2  | 1  | 1  |    |    |     |       |  |
| Ceftiofur                         | TIO          | CON                 | 2              |                  |      |     | 6  | 10 | 8  | 3  | 12 |    |    |     |       |  |
|                                   |              | NAT                 |                |                  |      | 2   |    | 1  |    | 1  |    |    |    |     |       |  |
| Clindamycin                       | CLI          | CON                 |                |                  |      |     |    |    |    |    |    | 41 |    |     |       |  |
|                                   |              | NAT                 |                |                  |      |     |    |    |    | 3  | 1  |    |    |     |       |  |
| Chlortetracycline                 | CTET         | CON                 | 2              |                  |      |     | 6  |    | 32 |    | 1  |    |    |     |       |  |
|                                   |              | NAT                 |                |                  |      | 4   |    |    |    |    |    |    |    |     |       |  |
| Danofloxacin                      | DANO         | CON                 | 22             |                  | 6    | 3   | 6  | 4  |    |    |    |    |    |     |       |  |
|                                   |              | NAT                 | 4              |                  |      |     |    |    |    |    |    |    |    |     |       |  |
| Enrofloxacin                      | ENRO         | CON                 | 31             |                  | 2    | 7   |    | 1  |    |    |    |    |    |     |       |  |
|                                   |              | NAT                 | 4              |                  |      |     |    |    |    |    |    |    |    |     |       |  |
| Florfenicol                       | FFN          | CON                 | 1              |                  |      | 6   | 29 | 4  |    |    | 1  |    |    |     |       |  |
|                                   |              | NAT                 |                |                  |      | 2   |    | 2  |    |    |    |    |    |     |       |  |
| Gentamicin                        | GEN          | CON                 | 3              |                  |      |     |    |    | 25 | 12 | 1  |    |    |     |       |  |
|                                   |              | NAT                 | 3              |                  |      |     |    |    |    |    | 1  |    |    |     |       |  |
| Neomycin                          | NEO          | CON                 |                |                  |      |     |    |    |    | 7  | 11 | 1  | 22 |     |       |  |
|                                   |              | NAT                 | 2              |                  |      |     |    |    |    | 2  |    |    |    |     |       |  |
| Oxytetracycline                   | OXY          | CON                 | 2              |                  |      |     | 4  | 2  |    |    | 33 |    |    |     |       |  |
|                                   |              | NAT                 | 4              |                  |      |     |    |    |    |    |    |    |    |     |       |  |
| Penicillin                        | PEN          | CON                 | 5              |                  |      |     | 5  | 14 | 7  | 1  | 9  |    |    |     |       |  |
|                                   |              | NAT                 |                |                  |      | 2   | 1  |    | 1  |    |    |    |    |     |       |  |
| Sulphadimethoxine                 | SDM          | CON                 |                |                  |      |     |    |    |    |    |    |    |    | 41  |       |  |
|                                   |              | NAT                 |                |                  |      |     |    |    |    |    |    |    |    | 4   |       |  |
| Spectinomycin                     | SPE          | CON                 |                |                  |      |     |    |    |    |    |    | 7  |    | 34  |       |  |
|                                   |              | NAT                 | 2              |                  |      |     |    |    |    |    | 2  |    |    |     |       |  |
| Trimethoprim/<br>Sulfamethoxazole | SXT          | CON                 | 9              | 32               |      |     |    |    |    |    |    |    |    |     |       |  |
|                                   |              | NAT                 | 2              | 2                |      |     |    |    |    |    |    |    |    |     |       |  |
| Tiamulin                          | TIA          | CON                 |                |                  |      |     |    |    |    | 1  | 1  | 16 | 23 |     |       |  |
|                                   |              | NAT                 |                |                  |      |     |    |    |    |    | 2  | 2  |    |     |       |  |
| Tilmicosin                        | TIL          | CON                 |                |                  |      |     |    |    |    | 6  | 2  | 1  |    | 32  |       |  |
|                                   |              | NAT                 | 4              |                  |      |     |    |    |    |    |    |    |    |     |       |  |
| Tulathromycin                     | TUL          | CON                 | 4              |                  |      |     |    | 1  |    | 2  | 1  |    | 1  | 32  |       |  |
|                                   |              | NAT                 | 4              |                  |      |     |    |    |    |    |    |    |    |     |       |  |
| Tylosin tartarate                 | TYLT         | CON                 | 3              |                  |      |     |    |    |    |    |    | 4  | 34 |     |       |  |
|                                   |              | NAT                 | 2              |                  |      |     |    |    |    |    |    |    | 2  |     |       |  |

<sup>z</sup>Manage, CON=conventional management with antimicrobials, NAT=without antimicrobials.

<sup>y</sup>S, susceptible to the lowest concentration evaluated.

Table S4. Distribution of minimum inhibitory concentrations (MICS) of *Histophilus somni* (n=23) isolated from lung tissue of bovine respiratory disease mortalities. Dilutions tested are not shaded. Cells highlighted in yellow had growth at highest concentration evaluated. All mortalities received antimicrobials according to conventional feedlot management protocols.

MIC µg/mL

| Antimicrobial agent               | Abbreviation | S <sup>z</sup> | 0.12 | 0.25 | 0.5 | 1  | 2  | 4 | 8 | 16 | 32 | 64 | 128 | 256 | >256 |
|-----------------------------------|--------------|----------------|------|------|-----|----|----|---|---|----|----|----|-----|-----|------|
| Ampicillin                        | AMP          | 16             |      |      |     | 1  | 1  | 2 | 1 | 1  | 1  |    |     |     |      |
| Ceftiofur                         | TIO          | 18             |      |      |     |    |    |   |   | 5  |    |    |     |     |      |
| Clindamycin                       | CLI          | 4              |      |      |     |    |    |   |   | 10 | 6  | 1  | 2   |     |      |
| Chlortetracycline                 | CTET         | 7              |      |      |     | 10 | 5  | 1 |   |    |    |    |     |     |      |
| Danofloxacin                      | DANO         | 23             |      |      |     |    |    |   |   |    |    |    |     |     |      |
| Enrofloxacin                      | ENRO         | 2              |      |      |     | 6  | 12 | 2 | 1 |    |    |    |     |     |      |
| Florfenicol                       | FFN          | 8              |      |      | 1   | 1  | 4  | 8 | 1 |    |    |    |     |     |      |
| Gentamicin                        | GEN          | 22             |      |      |     |    | 1  |   |   |    |    |    |     |     |      |
| Neomycin                          | NEO          | 11             |      |      |     |    |    |   | 4 | 1  |    | 5  | 2   |     |      |
| Oxytetracycline                   | OXY          | 22             |      |      |     |    |    | 1 |   |    |    |    |     |     |      |
| Penicillin                        | PEN          | 22             |      |      |     | 1  |    |   |   |    |    |    |     |     |      |
| Sulphadimethoxine                 | SDM          | 16             |      |      | 1   |    | 4  | 2 |   |    |    |    |     |     |      |
| Spectinomycin                     | SPE          | 5              |      |      |     |    |    |   | 5 | 8  | 5  |    |     |     |      |
| Trimethoprim/<br>Sulfamethoxazole | SXT          | 5              |      |      |     |    |    |   |   |    | 5  | 13 |     |     |      |
| Tiamulin                          | TIA          | 3              |      |      |     |    | 4  | 6 | 2 | 1  |    | 7  |     |     |      |
| Tilmicosin                        | TIL          | 10             |      |      |     |    |    |   |   | 13 |    |    |     |     |      |
| Tulathromycin                     | TUL          | 2              |      |      |     |    |    |   |   |    |    |    |     | 21  |      |
| Tylosin tartarate                 | TYLT         | 0              |      |      |     | 1  | 3  | 4 | 5 | 7  | 2  | 1  |     |     |      |

<sup>z</sup>S, susceptible to the lowest concentration evaluated.
